# Supplementary material for: Multifunctional trastuzumab–chlorin e6 conjugate for the treatment of HER2-positive human breast cancer
Source: Royal Society of Chemistry journal article supplement (doi:10.1039/c7bm01084b), 2018-01-01
Supplement: c7bm01084b1.pdf [file c7bm01084b1.pdf]

## Supporting Information

### **Multifunctional Trastuzumab-Chlorin e6 Conjugate for Treatment of HER2-Positive Human Breast Cancer**

Kyoung Sub Kim<sup>1</sup>, Jiyoung Kim<sup>1</sup>, Da Hye Kim<sup>1</sup>, Hee Sook Hwang, Kun Na\*

Center for Photomedicine, Department of Biotechnology, The Catholic University of Korea, 43  
Jibong-ro, Wonmi-gu, Bucheon-si, Gyeonggi do, 420-743, Korea

[<sup>1</sup>]These authors contributed equally to this work.

\*Corresponding author

Kun Na, Ph.D.

E-mail: [kna6997@catholic.ac.kr](mailto:kna6997@catholic.ac.kr)

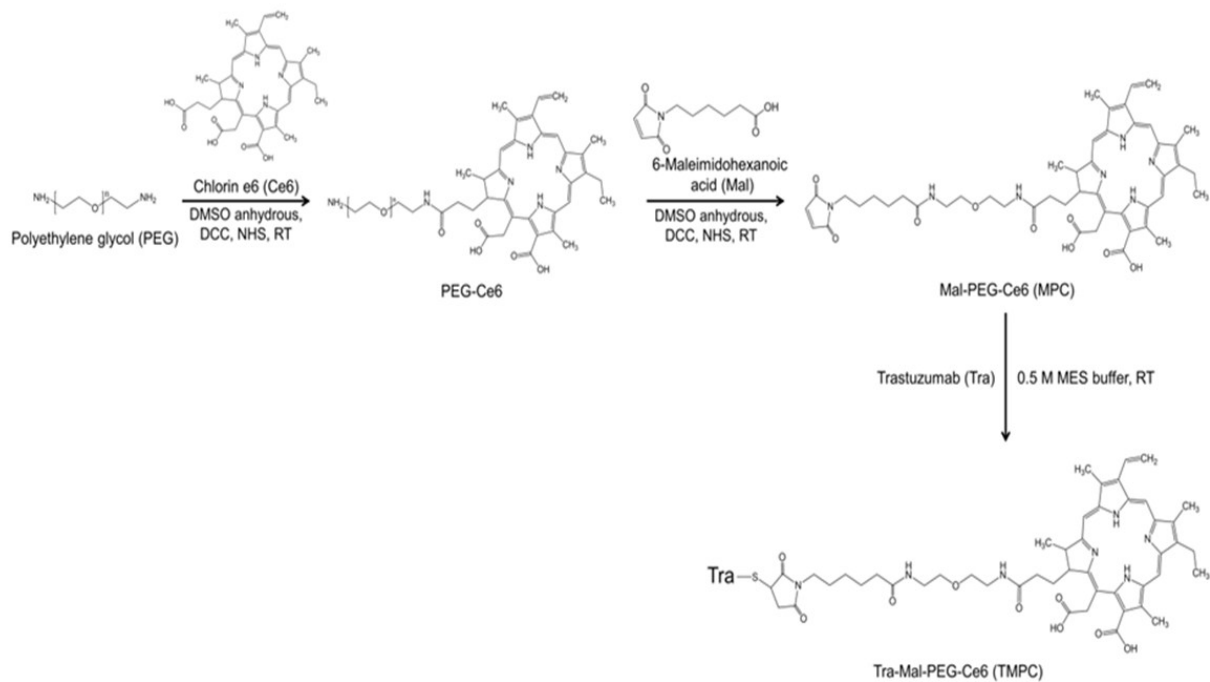

**Figure S1.** Synthetic scheme of TMPC.

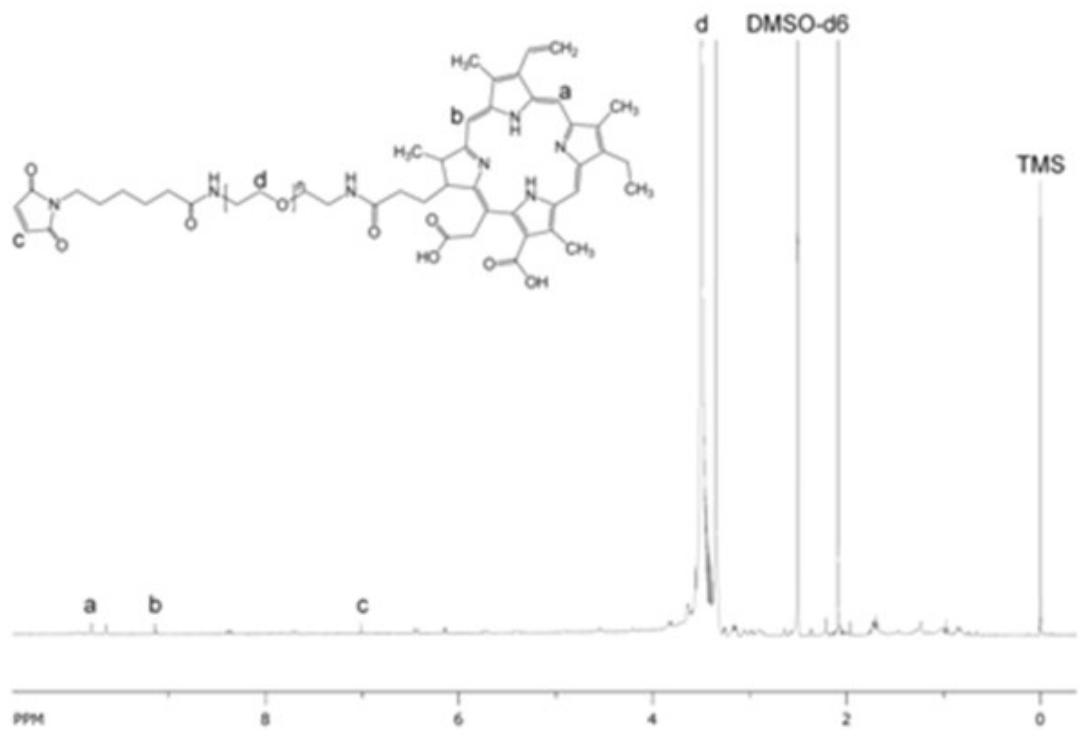

**Figure S2.** <sup>1</sup>H-NMR spectrum of MPC.

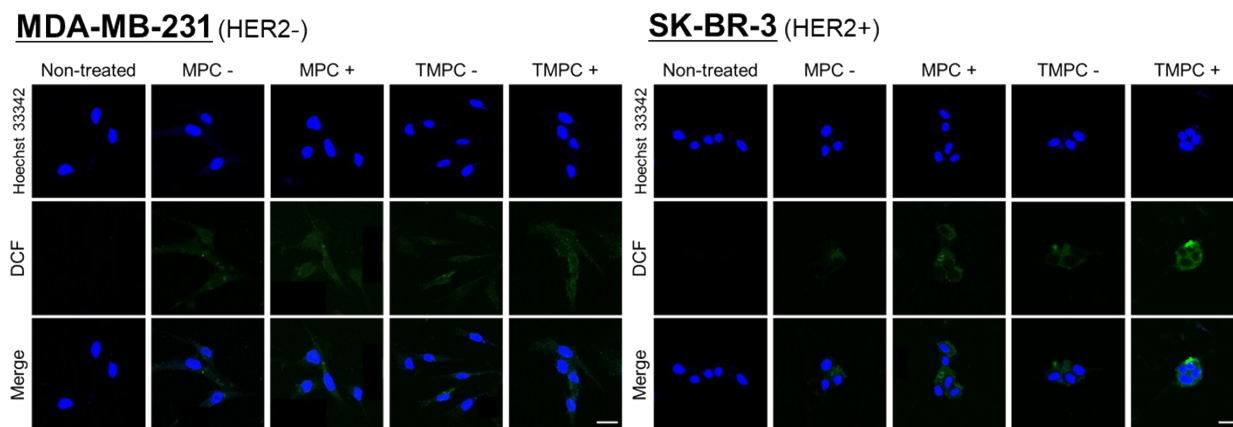

**Figure S3.** *In vitro* reactive oxygen species (ROS) generation efficacy using DCF-DA staining in MDA-MB-231 and SK-BR-3 cells incubated with MPC, TMPC upon laser irradiation for 40 sec. The irradiation power of the 671 nm light was 50 mW/cm<sup>2</sup>. The scale bar is 20  $\mu$ m.

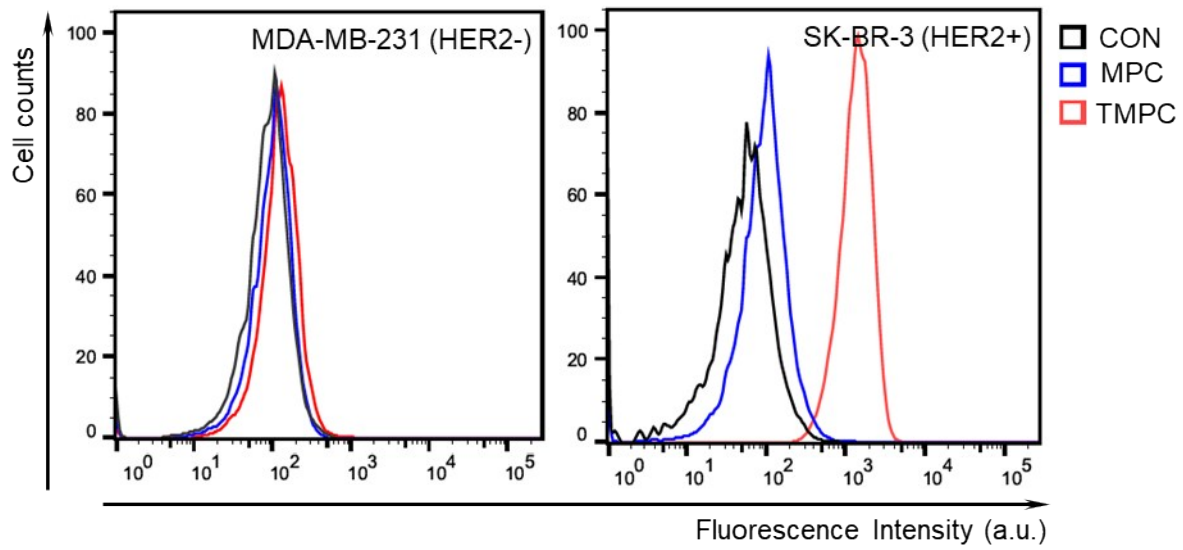

**Figure S4.** Flow cytometry quantification of MDA-MB231 (left) and SK-BR-3 (right) cells treated with MPC or TMPC for 1 h.

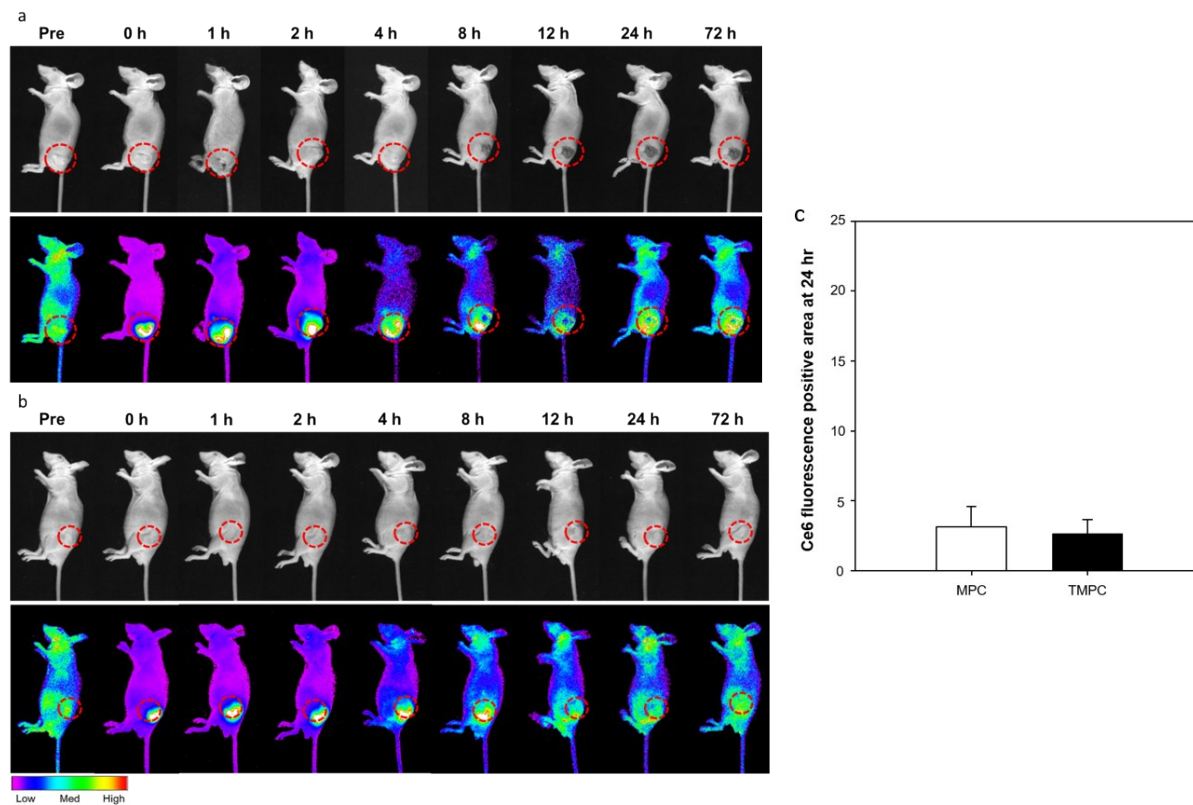

**Figure S5.** *In vivo* fluorescence images of MDA-MB-231 tumor-bearing mice after a) MPC and b) TMPC intratumoral injection with 50 J/cm<sup>2</sup> of laser irradiation. Red circle represents tumor area. c) Quantification of Ce6 fluorescence in tumor areas (n=3, mean ± SD).
